# Supplementary material for: Evaluation of Agar Dilution Method in Susceptibility Testing of Polymyxins for Enterobacteriaceae and Non-Fermentative Rods: Advantages Compared to Broth Microdilution and Broth Macrodilution
Source: MDPI journal article supplement (doi:10.3390/antibiotics11101392), 2022-10-11
Supplement: s1 [file s1]

**Table S1.** MIC distributions of isolates tested by AD method

| Species              | No. | Tested agents | R | S   | MIC range (µg/mL) | MIC (µg/mL) |     |     |    |   |
|----------------------|-----|---------------|---|-----|-------------------|-------------|-----|-----|----|---|
|                      |     |               |   |     |                   | 0.25        | 0.5 | 1   | 2  | 4 |
| <i>E. coli</i>       | 40  | PMB           | 0 | 40  | 0.5-1             |             | 19  | 21  |    |   |
| <i>K. pneumoniae</i> | 38  |               | 0 | 38  | 1-2               |             |     | 31  | 7  |   |
| <i>E. cloacae</i>    | 37  |               | 0 | 37  | 0.5-2             |             | 5   | 27  | 5  |   |
| <i>K. aerogenes</i>  | 30  |               | 0 | 30  | 0.5-1             |             | 4   | 26  |    |   |
| <i>A. baumannii</i>  | 38  |               | 0 | 38  | 0.5-2             |             | 7   | 27  | 4  |   |
| <i>P. aeruginosa</i> | 37  |               | 1 | 36  | 1-4               |             |     | 10  | 26 | 1 |
| Total                | 220 |               | 1 | 219 |                   |             | 35  | 142 | 42 | 1 |
| <i>E. coli</i>       | 40  | CST           | 0 | 40  | 0.25-1            | 5           | 34  | 1   |    |   |
| <i>K. pneumoniae</i> | 38  |               | 0 | 38  | 0.5-1             |             | 29  | 9   |    |   |
| <i>E. cloacae</i>    | 37  |               | 0 | 37  | 0.25-1            | 1           | 32  | 4   |    |   |
| <i>K. aerogenes</i>  | 30  |               | 0 | 30  | 0.25-0.5          | 1           | 29  |     |    |   |
| <i>A. baumannii</i>  | 38  |               | 0 | 38  | 0.25-2            | 1           | 13  | 23  | 1  |   |
| <i>P. aeruginosa</i> | 37  |               | 0 | 37  | 0.5-2             |             | 1   | 9   | 27 |   |
| Total                | 220 |               | 0 | 220 |                   | 8           | 138 | 46  | 28 |   |

No.: number; R: resistant; S: susceptible; PMB: polymyxin B; CST: colistin; AD: agar dilution

**Table S2.** MIC distributions of isolates tested by rBMD\* method

| Species              | No. | Tested agents | R  | S   | MIC range (µg/mL) | MIC (µg/mL) |     |     |    |   |
|----------------------|-----|---------------|----|-----|-------------------|-------------|-----|-----|----|---|
|                      |     |               |    |     |                   | 0.5         | 1   | 2   | 4  | 8 |
| <i>E. coli</i>       | 40  | PMB           | 1  | 39  | 0.5-4             | 1           | 17  | 21  | 1  |   |
| <i>K. pneumoniae</i> | 38  |               | 4  | 34  | 0.5-4             | 1           | 12  | 21  | 4  |   |
| <i>E. cloacae</i>    | 37  |               | 4  | 33  | 0.5-4             | 7           | 7   | 19  | 4  |   |
| <i>K. aerogenes</i>  | 30  |               | 1  | 29  | 1-4               |             | 8   | 21  | 1  |   |
| <i>A. baumannii</i>  | 38  |               | 6  | 32  | 1-8               |             | 6   | 26  | 4  |   |
| <i>P. aeruginosa</i> | 37  |               | 11 | 26  | 1-4               |             | 2   | 24  | 11 |   |
| Total                | 220 |               | 27 | 193 |                   | 9           | 52  | 132 | 25 | 2 |
| <i>E. coli</i>       | 40  | CST           | 1  | 39  | 1-4               |             | 31  | 8   | 1  |   |
| <i>K. pneumoniae</i> | 38  |               | 3  | 35  | 1-4               |             | 24  | 11  | 3  |   |
| <i>E. cloacae</i>    | 37  |               | 0  | 37  | 1-2               |             | 26  | 11  |    |   |
| <i>K. aerogenes</i>  | 30  |               | 0  | 30  | 1-2               |             | 23  | 7   |    |   |
| <i>A. baumannii</i>  | 38  |               | 3  | 35  | 0.5-4             | 1           | 19  | 15  | 3  |   |
| <i>P. aeruginosa</i> | 37  |               | 13 | 24  | 1-4               |             | 3   | 21  | 13 |   |
| Total                | 220 |               | 20 | 200 |                   | 1           | 126 | 73  | 20 |   |

No.: number; R: resistant; S: susceptible; PMB: polymyxin B; CST: colistin; rBMD: reference broth microdilution

\*: using tissue culture-treated microtiter plates

**Table S3.** MIC distributions of isolates tested by BMAD method

| Species              | No. | Tested agents | R | S   | MIC range (µg/mL) | MIC (µg/mL) |      |     |    |    |   |
|----------------------|-----|---------------|---|-----|-------------------|-------------|------|-----|----|----|---|
|                      |     |               |   |     |                   | 0.125       | 0.25 | 0.5 | 1  | 2  | 4 |
| <i>E. coli</i>       | 40  | PMB           | 0 | 40  | 0.25-2            | 15          | 17   | 7   | 1  |    |   |
| <i>K. pneumoniae</i> | 38  |               | 2 | 36  | 0.25-4            | 2           | 15   | 13  | 6  | 2  |   |
| <i>E. cloacae</i>    | 37  |               | 0 | 37  | 0.25-2            | 10          | 22   | 4   | 1  |    |   |
| <i>K. aerogenes</i>  | 30  |               | 0 | 30  | 0.25-2            | 12          | 13   | 4   | 1  |    |   |
| <i>A. baumannii</i>  | 38  |               | 1 | 37  | 0.25-4            | 5           | 17   | 14  | 1  | 1  |   |
| <i>P. aeruginosa</i> | 37  |               | 0 | 37  | 0.25-2            | 1           | 11   | 22  | 3  |    |   |
| Total                | 220 |               | 3 | 217 |                   | 45          | 95   | 64  | 13 | 3  |   |
| <i>E. coli</i>       | 40  | CST           | 0 | 40  | 0.125-1           | 2           | 19   | 14  | 5  |    |   |
| <i>K. pneumoniae</i> | 38  |               | 1 | 37  | 0.25-4            | 9           | 14   | 10  | 4  | 1  |   |
| <i>E. cloacae</i>    | 37  |               | 1 | 36  | 0.25-4            | 19          | 13   | 3   | 1  | 1  |   |
| <i>K. aerogenes</i>  | 30  |               | 2 | 28  | 0.25-4            | 9           | 14   | 5   |    | 2  |   |
| <i>A. baumannii</i>  | 38  |               | 0 | 38  | 0.5-2             |             | 23   | 13  | 2  |    |   |
| <i>P. aeruginosa</i> | 37  |               | 4 | 33  | 0.25-4            | 2           | 5    | 14  | 12 | 4  |   |
| Total                | 220 |               | 8 | 212 |                   | 2           | 58   | 83  | 50 | 19 | 8 |

No.: number; R: resistant; S: susceptible; PMB: polymyxin B; CST: colistin; BMAD: broth macrodilution

**Table S4.** Characteristics of the 220 isolates used in the study

| Species              | Phenotype | No. |
|----------------------|-----------|-----|
| <i>E. coli</i>       | CRE       | 10  |
|                      | ESBLs(+)  | 15  |
|                      | ESBLs(-)  | 15  |
|                      | Total     | 40  |
| <i>K. pneumoniae</i> | CRE       | 12  |
|                      | ESBLs(+)  | 11  |
|                      | ESBLs(-)  | 15  |
|                      | Total     | 38  |
| <i>E. cloacae</i>    | CRE       | 12  |
|                      | Non-CRE   | 25  |
|                      | Total     | 37  |
| <i>K. aerogenes</i>  | CRE       | 11  |
|                      | Non-CRE   | 19  |
|                      | Total     | 30  |
| <i>A. baumannii</i>  | CRAB      | 10  |
|                      | Non-CRAB  | 28  |
|                      | Total     | 38  |
| <i>P. aeruginosa</i> | CRPA      | 6   |
|                      | Non-CRPA  | 31  |
|                      | Total     | 37  |

No.: number
